# Supplementary material for: A Comprehensive Bioinformatics Analysis of the Nudix Superfamily in Arabidopsis thaliana
Source: Comp Funct Genomics. 2009 Jul 2;2009:820381. doi: 10.1155/2009/820381 (PMC2707057; doi:10.1155/2009/820381)
Supplement: Supplementary file 1 — Supplement Table A presenrs: Matrix of CLUSTALW scores from pairwise sequence alignment. Boxes where >30% sequence identity was detected by CLUSTALW alignment are colored in orange. Supplement Figure A presenrs: Sequence alignment of ApnA hydrolases from plants. The protein products of the Arabidopsis genes At1g30110, At3g10620 and At5g06340 and their counterparts from Lupinus angustifolius (gi:1888557), Oryza sativa (gi:50929793) and Hordeum vulgare (gi:2564253) are aligned using the CLUSTAL W algorithm. Motif 4 present only in the At1g30110 gene product is underlined in red. The N-terminal extensions forming putative preprotein sequences in all proteins excluding the At1g30110 gene product are underlined in green. [file 820381.f1.pdf]

**Table A** – Matrix of CLUSTALW scores from pairwise sequence alignment.

Boxes where >30% sequence identity was detected by CLUSTALW alignment are colored in orange.

|           | At1g30110 | At3g10620 | At5g06340 | At1g12880 | At1g14860 | At1g73540 | At1g18300 | At2g01670 | At3g12600 | At3g26690 | At1g28960 | At2g33980 | At5g45940 |
|-----------|-----------|-----------|-----------|-----------|-----------|-----------|-----------|-----------|-----------|-----------|-----------|-----------|-----------|
| At1g30110 | NA        |           |           |           |           |           |           |           |           |           |           |           |           |
| At3g10620 | 51        | N/A       |           |           |           |           |           |           |           |           |           |           |           |
| At5g06340 | 48        | 51        | N/A       |           |           |           |           |           |           |           |           |           |           |
| At1g12880 | 16        | 9         | 10        | N/A       |           |           |           |           |           |           |           |           |           |
| At1g14860 | 17        | 13        | 12        | 47        | N/A       |           |           |           |           |           |           |           |           |
| At1g73540 | 13        | 9         | 19        | 40        | 44        | N/A       |           |           |           |           |           |           |           |
| At1g18300 | 14        | 7         | 8         | 38        | 47        | 73        | N/A       |           |           |           |           |           |           |
| At2g01670 | 17        | 8         | 16        | 40        | 78        | 46        | 40        | N/A       |           |           |           |           |           |
| At3g12600 | 7         | 5         | 15        | 44        | 42        | 38        | 36        | 45        | N/A       |           |           |           |           |
| At3g26690 | 16        | 6         | 9         | 76        | 46        | 38        | 38        | 39        | 45        | N/A       |           |           |           |
| At1g28960 | 17        | 8         | 6         | 10        | 15        | 10        | 12        | 5         | 8         | 6         | N/A       |           |           |
| At2g33980 | 16        | 8         | 8         | 15        | 12        | 5         | 14        | 8         | 12        | 14        | 70        | N/A       |           |
| At5g45940 | 11        | 6         | 14        | 11        | 10        | 18        | 11        | 10        | 10        | 7         | 50        | 48        | N/A       |
| At2g04430 | 13        | 6         | 4         | 7         | 10        | 13        | 9         | 7         | 9         | 10        | 5         | 10        | 7         |
| At2g04450 | 15        | 13        | 10        | 15        | 17        | 22        | 15        | 7         | 10        | 11        | 8         | 12        | 8         |
| At4g12720 | 13        | 10        | 7         | 9         | 15        | 12        | 12        | 7         | 12        | 8         | 4         | 4         | 4         |
| At5g47240 | 14        | 16        | 9         | 8         | 7         | 16        | 10        | 10        | 11        | 9         | 8         | 13        | 8         |
| At5g47650 | 15        | 12        | 13        | 7         | 11        | 6         | 10        | 8         | 11        | 4         | 4         | 6         | 12        |
| At1g68760 | 18        | 12        | 14        | 9         | 17        | 12        | 10        | 17        | 17        | 10        | 12        | 21        | 14        |
| At1g79690 | 16        | 7         | 8         | 11        | 15        | 6         | 9         | 9         | 8         | 4         | 7         | 10        | 15        |
| At2g42070 | 12        | 10        | 9         | 7         | 16        | 9         | 11        | 9         | 12        | 5         | 5         | 11        | 6         |
| At4g11980 | 12        | 13        | 12        | 6         | 10        | 5         | 6         | 9         | 18        | 10        | 10        | 9         | 8         |
| At5g13570 | 16        | 13        | 7         | 16        | 10        | 15        | 16        | 7         | 11        | 12        | 8         | 12        | 10        |
| At5g20070 | 18        | 8         | 9         | 10        | 12        | 16        | 17        | 8         | 9         | 8         | 5         | 4         | 11        |
| At4g25440 | 9         | 16        | 5         | 7         | 12        | 7         | 1         | 10        | 6         | 8         | 3         | 5         | 6         |

|           | At2g04430 | At2g04450 | At4g12720 | At5g47240 | At5g47650 | At1g68760 | At1g79690 | At2g42070 | At4g11980 | At5g13570 | At5g20070 | At4g25440 |
|-----------|-----------|-----------|-----------|-----------|-----------|-----------|-----------|-----------|-----------|-----------|-----------|-----------|
| At1g30110 |           |           |           |           |           |           |           |           |           |           |           |           |
| At3g10620 |           |           |           |           |           |           |           |           |           |           |           |           |
| At5g06340 |           |           |           |           |           |           |           |           |           |           |           |           |
| At1g12880 |           |           |           |           |           |           |           |           |           |           |           |           |
| At1g14860 |           |           |           |           |           |           |           |           |           |           |           |           |
| At1g73540 |           |           |           |           |           |           |           |           |           |           |           |           |
| At1g18300 |           |           |           |           |           |           |           |           |           |           |           |           |
| At2g01670 |           |           |           |           |           |           |           |           |           |           |           |           |
| At3g12600 |           |           |           |           |           |           |           |           |           |           |           |           |
| At3g26690 |           |           |           |           |           |           |           |           |           |           |           |           |
| At1g28960 |           |           |           |           |           |           |           |           |           |           |           |           |
| At2g33980 |           |           |           |           |           |           |           |           |           |           |           |           |
| At5g45940 |           |           |           |           |           |           |           |           |           |           |           |           |
| At2g04430 | N/A       |           |           |           |           |           |           |           |           |           |           |           |
| At2g04450 | 58        | N/A       |           |           |           |           |           |           |           |           |           |           |
| At4g12720 | 54        | 61        | N/A       |           |           |           |           |           |           |           |           |           |
| At5g47240 | 44        | 44        | 41        | N/A       |           |           |           |           |           |           |           |           |
| At5g47650 | 44        | 47        | 48        | 48        | N/A       |           |           |           |           |           |           |           |
| At1g68760 | 14        | 15        | 19        | 14        | 20        | N/A       |           |           |           |           |           |           |
| At1g79690 | 15        | 14        | 8         | 8         | 13        | 15        | N/A       |           |           |           |           |           |
| At2g42070 | 6         | 5         | 7         | 8         | 14        | 17        | 13        | N/A       |           |           |           |           |
| At4g11980 | 10        | 9         | 9         | 11        | 13        | 13        | 6         | 3         | N/A       |           |           |           |
| At5g13570 | 6         | 10        | 10        | 6         | 12        | 16        | 13        | 12        | 4         | N/A       |           |           |
| At5g20070 | 7         | 13        | 7         | 11        | 10        | 18        | 8         | 18        | 5         | 9         | N/A       |           |
| At4g25440 | 9         | 7         | 9         | 3         | 6         | 6         | 3         | 7         | 5         | 1         | 4         | N/A       |

### **Figure A – Sequence alignment of Ap<sub>n</sub>A hydrolases from plants**

The protein products of the *Arabidopsis* genes At1g30110, At3g10620 and At5g06340 and their counterparts from *Lupinus angustifolius* (gi:1888557), *Oryza sativa* (gi:50929793) and *Hordeum vulgare* (gi:2564253) are aligned using the CLUSTAL W algorithm. Motif 4 present only in the At1g30110 gene product is underlined in red. The N-terminal extensions forming putative preprotein sequences in all proteins excluding the At1g30110 gene product are underlined in green.

Lupinus 1...MALCR·LVO.....SPTINHFRRKYPsk.....FLKSSLSLAFRY.....CHSS 39  
At3g10620 1...MALYRPLLLHH.....PTSPSVTFLRNYPsk.....PIKSSLPFLHRQAKSRVSSS.....ARCCSS 65  
Hordeum 1...MTVAARCL.....LITPTISSSS·\$AAAA.....VLRPRVAR·RPLS·CSASP.....LAVFAS 49  
Oryza 1...MVVSVARLP.....ILVSPIRRT·TATR.....RLPSSALRLTRLSSCSASP.....LAVVAS 54  
At5g06340 1QFNNDIADENSINEPPTETRAHSPHATEHYDRLASEL I KEPRTEINATGMHFAIG TKMAVVASGF IGKSAISVHLDTSSFPVKFSQLKQFSVSSGKPLVLSVALSSPART 112  
At1g30110 .....

Lupinus 40 MDSPPEGYRRNVG ICLMN·NDKH IFAASRLD I PDAMQNP DGG I DEGEDP RNAAI RELREETGYTSAEVI AEVPYWL TYDFP PKVREKLN I DNG·SOMXGDAQWFLFKFTG 149  
At3g10620 58 MESPPPEGYRRNVGVCLMN·SSKH IFTASRLD IPSAMQNP DGG I DEGEDP RVAVURELKEETGYHSAEILAEAPHMI TYDFP DVREKLVKVRNG·SOMXGDAQWFLFKFTG 185  
Hordeum 50 MDSPPEGYRTNVG ICLADPSLTH IFSASRI D I PTAMQNP DGG I DGGEEPRAAAI RELREETGYRSAEI VAEAPNWL TYDFP ADVKDKLNARNG·TNWXGDAQWFLFRLTG 180  
Oryza 55 METPPENYRTNVG ICLADPSLTH IFTASRI DIANTMNP DGG I DAGEDPREAATRELREETGYTSAEMVAEVPVWL TYDFP DVKHEKLNARNGG·TNWXGDAQWFLFRFTG 188  
At5g06340 113 VESPPVGYRKNVG ICLVS·PCRN IFTASK IHPDTMNP DGG I DGGADEGEDL RNAATRELREETGYTSAE I AEI PNWL TYDFPREVKDKLNKWR·TSXGDAQWFLFKFTG 222  
At1g30110 1 MENLP PGYRPNVGVCL I N·SDNLVFVASRL NVPGAMQNP DGG I DGGEDPKSAARELDEETGYVSAEIVEVPNWL TYDFP PAVHAAYVRLNG·GEMHGDAQWFLVRLRND 110

Lupinus 150 DDE...INLLGDGSEKPEFGEVSWTPEQL I DLTVEFKKPYKKEVLSVFAPHL..... 189  
At3g10620 188 DEE...INLLGDGTEKPEFGEIWSITSPQOVENAVEFKKPYKKEVMSAFASHLQ..... 216  
Hordeum 181 DDE...INLMGDGSEKPEFSEWAMTPKQVIEKAVDFKKPYVEETLKHFAPYLQSDPAASS..... 218  
Oryza 187 EDE...VNLNGDGSERPEFCEWTMTI PQQVIEKAVEFKKPYVEAALKHFAPYLQSDPATTS... 228  
At5g06340 223 EEE...INLLGDGIAKPEFKVWSMLPEQVIEHAVTFKKPYVEHVIHQFNPFVDEEKDSMNSKD· 285  
At1g30110 111 EDEKEINLANN·EADSEFAEMWMAKPEEVEQAVDYKRP TYEEV I KTFGFLNDTGRAKCKSAKW 175
